# Supplementary material
Source: publisher site journal article supplement (https://spandidos-publications.com/6199/downloadSupplementary)

Figure S1. Immunohistochemical analysis of atypical meningiomas. (A) Somatostatin receptor 2A staining, (B) S100 staining and (C) SOX10 staining (magnification, x200).

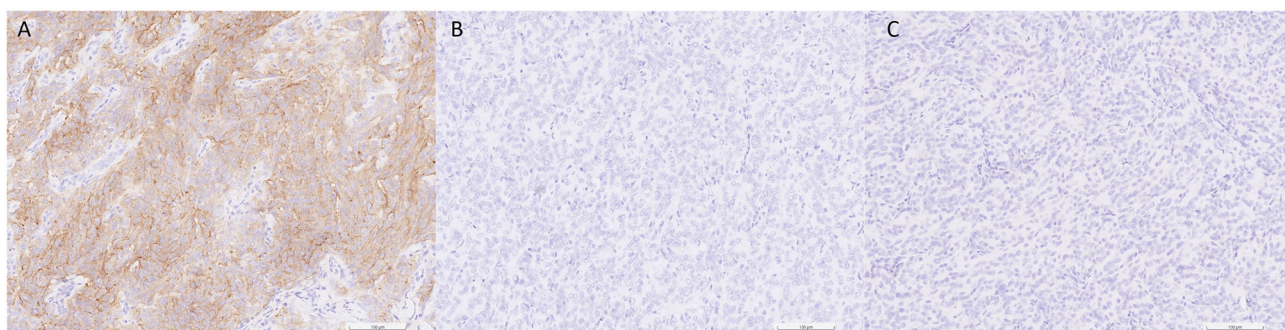

Supplement: Supplementary file 1 [file downloadSupplementary]
